# Supplementary material
Source: PubMed Central journal article supplement (PMC6479045)
Supplement: IAI.00046-19-s0001.pdf [file IAI.00046-19-s0001.pdf]

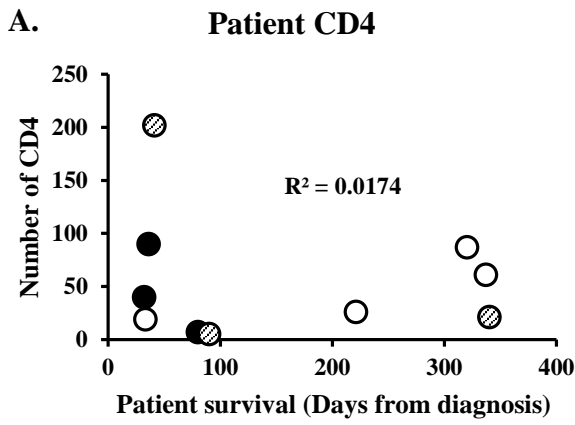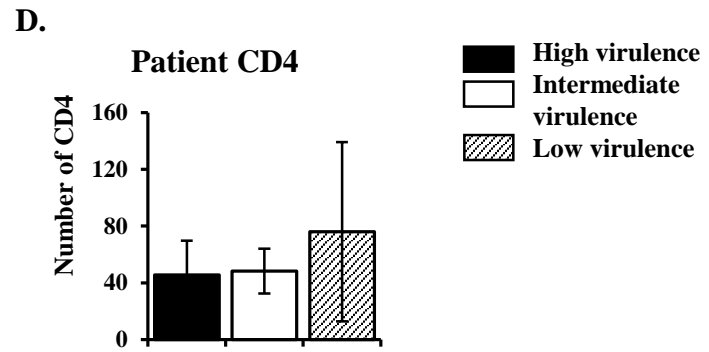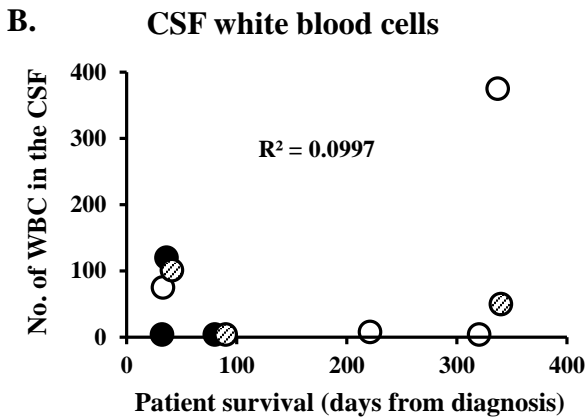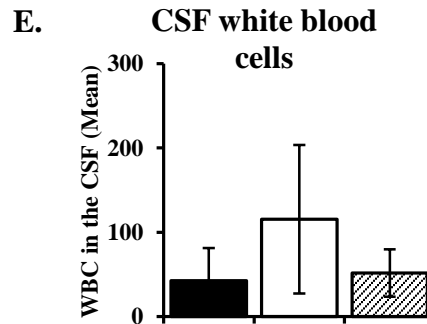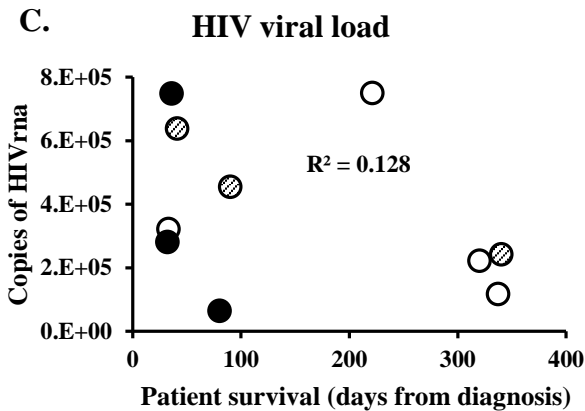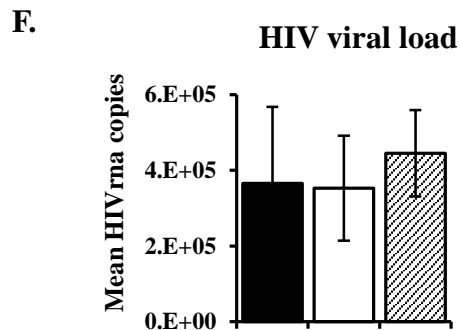

**Supplemental Figure 1. Human mortality is not determined by patient parameters.** Clinical outcome was compared to baseline CM patient characteristics including CD4+ cells (A, D), white blood cell counts in the CSF (B, E), and HIV viral load (C, F). Graph A-C show individual participant parameters plotted against survival from diagnosis. Graphs D-F show patient parameters when classified by degree of virulence in the mouse model of cryptococcosis. Strains were classified in three groups: high (filled), intermediate (empty) and low virulence (striped) strains. Error bars represent standard error of the mean. CD4 cells: CD4+ T helper cells, CM: cryptococcal meningitis, CSF: cerebrospinal fluid, HIV: human immunodeficiency virus, RNA: ribonucleic acid, WBC: white blood cells.
