# Supplementary material
Source: PubMed Central journal article supplement (PMC6479045)
Supplement: IAI.00046-19-s0003.pdf [file IAI.00046-19-s0003.pdf]

Growth in YPD at 30°C

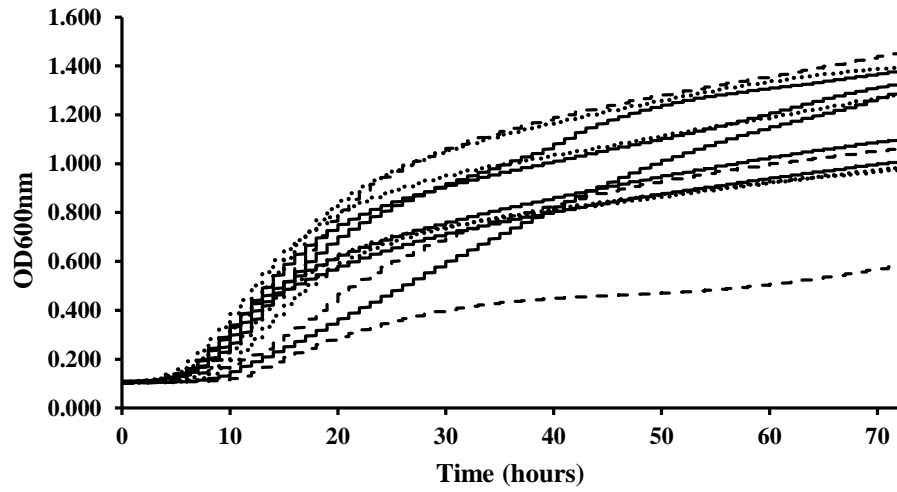

Growth at 37°C in YPD

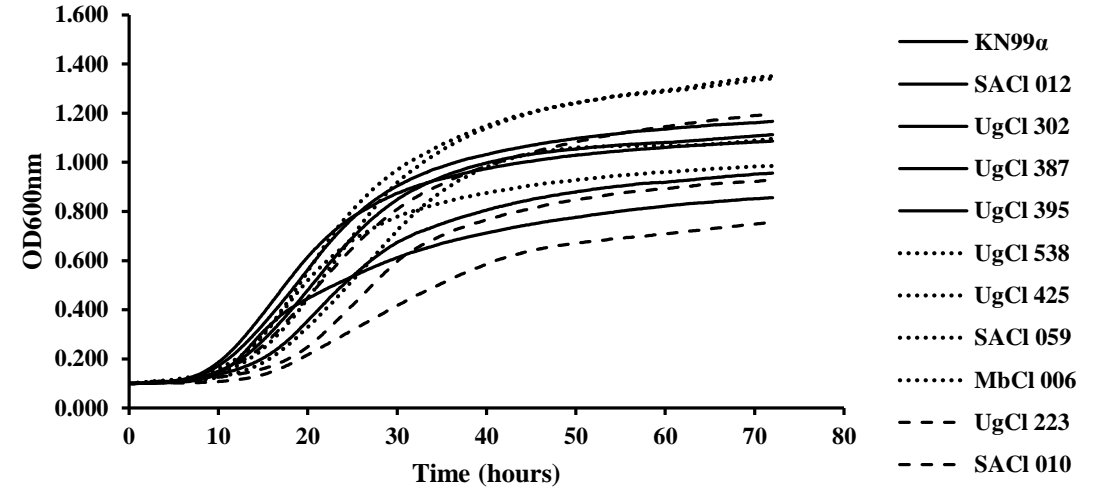

RPMI at 37°C

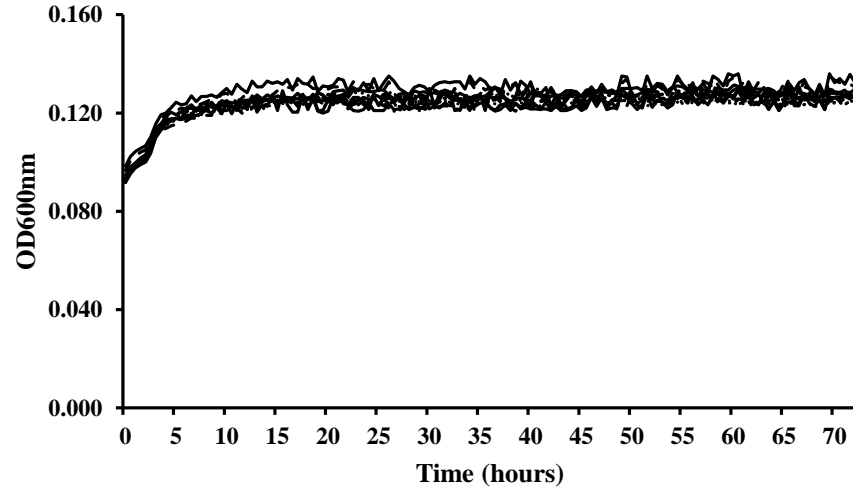

DMEM at 37°C

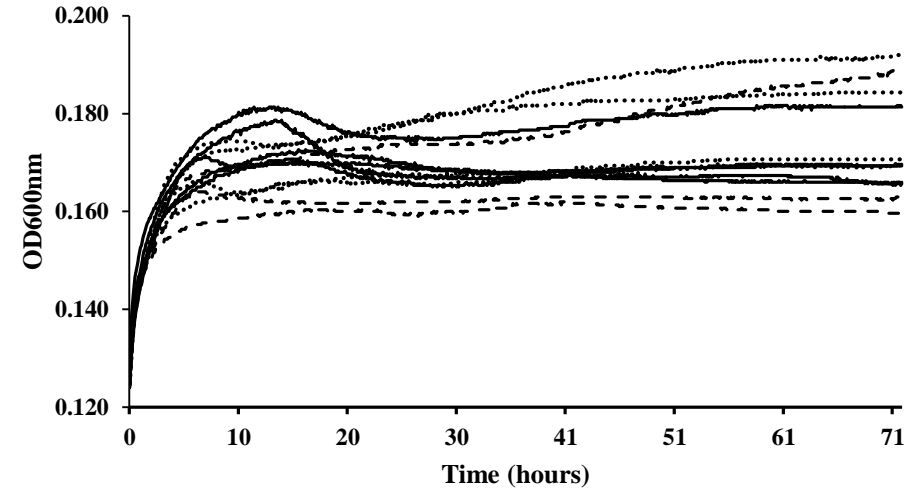

**Supplemental Figure 3. Absolute growth of clinical strains.** Eleven *C. neoformans* clinical strains and the wild type control (KN99 $\alpha$ ) were grown overnight in YPD broth at 30°C, washed with PBS, and counted with a hemocytometer.  $5 \times 10^3$  yeast cells were transferred into 96-well plates containing 200  $\mu$ l of either YPD (A, B), RPMI (C) or DMEM and grown at 30 or 37°C. Absorbances (OD600nm) were read during a 72 h incubation. Straight lines: high virulence strains, dotted lines: strains with intermediate virulence, dashed lines; low virulence strains. OD: optical density, DMEM: Dulbecco's Modified Eagle's Medium, RPMI: Roswell Park Memorial Institute medium, YPD: yeast extract-peptone-dextrose.
