# Supplementary material
Source: PubMed Central journal article supplement (PMC6479045)
Supplement: IAI.00046-19-s0004.pdf [file IAI.00046-19-s0004.pdf]

**A. Capsule formation in DMEM+FCS**

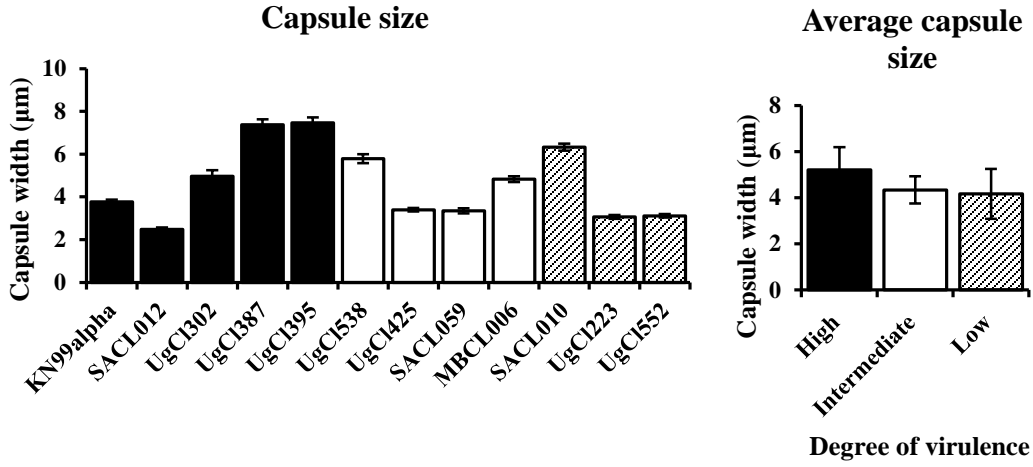

**B. Capsule formation in Minimal Media**

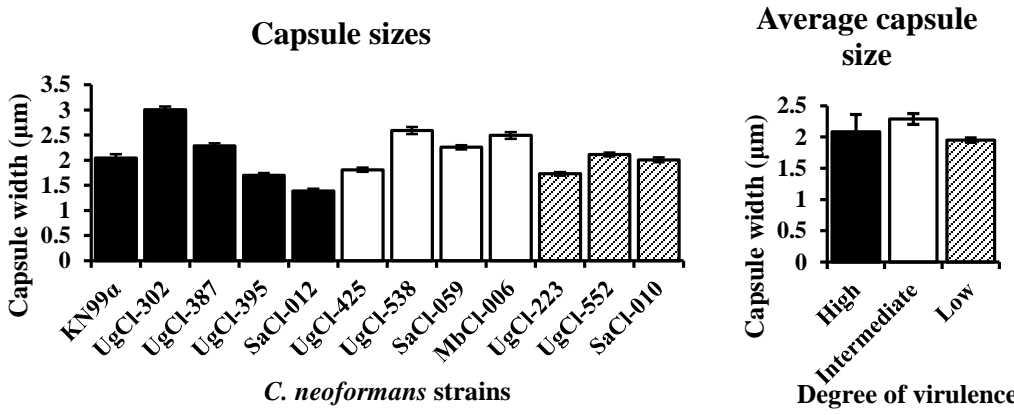

**C. Capsule formation in PBS+FCS**

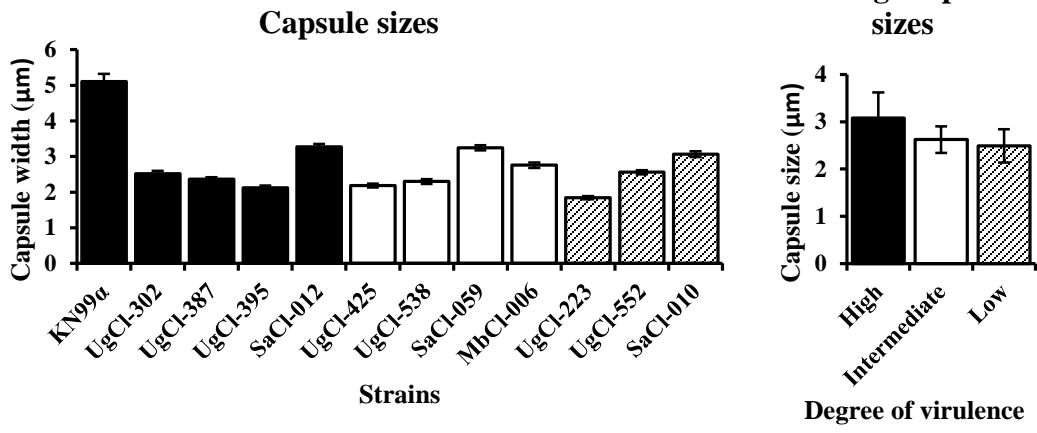

**Supplemental Figure 4. *In vitro* capsule formation of clinical strains.** A *C. neoformans* wild type control strain and eleven clinical strains were induced to form capsule *in vitro* under three different conditions. **A)** Capsule induction in DMEM and serum: yeast cells were grown overnight in YPD, washed and then transferred into DMEM supplemented with FCS and incubated at 37°C, 5% CO<sub>2</sub> for 5 days. **B)** Capsule induction in Minimal media: yeast cells were grown 22 h at 30°C in YPD, washed and resuspended in minimal media at a final concentration of 1 x 10<sup>6</sup> cells/ml and incubated at 30°C with shaking (800rpm) in a thermomixer for 48 hours. **C)** Capsule induction in PBS and serum: yeast cells were grown overnight in YNB, washed and then transferred into PBS supplemented with FCS and incubated at 37°C, 5% CO<sub>2</sub> for 48 hours. After incubation, yeast cells were fixed with 3.7% formaldehyde and observed under the microscope. The capsule width was defined as the difference between the diameter of the whole yeast cell (cell body and capsule) and the cell body diameter (no capsule) divided by 2. One hundred cells per strain was analyzed. Error bars represent standard error of the mean. DMEM: Dulbecco's Modified Eagle's Medium, FCS: Fetal calf serum, PBS: Phosphate buffered saline, YNB: yeast nitrogen base medium, YPD: yeast extract-peptone-dextrose.
