# Supplementary material
Source: PubMed Central journal article supplement (PMC6479045)
Supplement: IAI.00046-19-s0005.pdf [file IAI.00046-19-s0005.pdf]

**Supplemental Table 1. Mouse lung histology**

|                               | Strain        | LOCATION OF <i>CRYPTOCOCCUS</i> CELLS |                                         |                 |                      |                    | IMMUNE RESPONSE |      |                              |
|-------------------------------|---------------|---------------------------------------|-----------------------------------------|-----------------|----------------------|--------------------|-----------------|------|------------------------------|
|                               |               | Airways                               | Bronchial Epithelium/<br>Lamina Propria | Central Alveoli | Inter-alveolar septa | Peripheral Alveoli | Granuloma       | PMNs | Macrophages /Dendritic Cells |
| <b>High virulence</b>         | Non-infected  | -                                     | -                                       | -               | -                    | -                  | -               | -    | -                            |
|                               | KN99 $\alpha$ | +                                     | -                                       | +++             | +                    | +++                | +++             | ++   | ++                           |
|                               | SACI012-1     | +/+++                                 | -                                       | ++              | -                    | ++                 | +/+++           | ++   | +++                          |
|                               | SACI012-2     | +/+++                                 | -                                       | ++              | -                    | +                  | ++              | ++   | ++                           |
|                               | SACI012-3     | ++                                    | -                                       | ++              | -                    | +/+++              | ++              | ++   | ++                           |
|                               | SACI012-4     | ++                                    | -                                       | +++             | -                    | +                  | ++              | ++   | ++                           |
|                               | UgCI302-1     | +                                     | +                                       | +++             | -                    | ++/+++             | ++              | ++   | ++                           |
|                               | UgCI302-2     | +                                     | -                                       | +++             | -                    | +++                | +++             | +    | +                            |
|                               | UgCI387-1     | +                                     | +                                       | +++             | -                    | ++                 | ++              | ++   | ++                           |
|                               | UgCI387-2     | ++                                    | -                                       | +++             | -                    | ++                 | ++              | ++   | ++                           |
| UgCI395-1                     | +             | -                                     | +++                                     | -               | ++/+++               | ++                 | ++              | +++  |                              |
| <b>Intermediate virulence</b> | UgCI538-1     | ++                                    | -                                       | +++             | -                    | +++                | -               | -    | -                            |
|                               | UgCI538-2     | -                                     | -                                       | ++              | -                    | +                  | -/+             | -    | ++                           |
|                               | UgCI425-1     | ++                                    | +++                                     | ++              | ++                   | ++                 | ++              | -    | +++                          |
|                               | UgCI425-2     | +                                     | ++                                      | ++              | ++                   | ++                 | +++             | ++   | +++                          |
|                               | SACI059-1     | +/+++                                 | ++                                      | ++              | ++                   | ++                 | +++             | +++  | +++                          |
|                               | MbCI006-1-1   | -                                     | -                                       | +/+++           | -                    | +                  | ++              | +    | ++                           |
|                               | MbCI006-1-2   | +                                     | -                                       | +/+++           | -                    | +                  | ++              | +    | ++                           |
| <b>Low virulence</b>          | UgCI552-1     | -                                     | -                                       | -               | -                    | -                  | -               | -    | -                            |
|                               | UgCI552-2     | -                                     | -                                       | -               | -                    | -                  | -               | -    | -                            |
|                               | UgCI223-1     | +                                     | ++                                      | +               | ++                   | +                  | +/+++           | ++   | ++                           |
|                               | UgCI223-2     | -                                     | -                                       | +               | -                    | +                  | +               | -    | +                            |
|                               | SACI010-1     | -                                     | -                                       | +               | -                    | -/+                | -/+             | +    | +                            |
|                               | SACI010-2     | -                                     | -                                       | +               | -                    | +                  | -/+             | +    | +                            |

Presence of *Cryptococcus*: - none, + scattered, ++ multi-focal, +++ confluent; PMN: polymorphonuclear cells; PVC: perivascular cuffing
