# Supplementary material
Source: PubMed Central journal article supplement (PMC6479045)
Supplement: IAI.00046-19-s0006.pdf [file IAI.00046-19-s0006.pdf]

**Supplemental Table 2. Mouse Brain Histology**

|                                   |           | LOCATION OF <i>CRYPTOCOCCUS</i> CELLS |          |            |                |           | IMMUNE RESPONSE |                                 |          |
|-----------------------------------|-----------|---------------------------------------|----------|------------|----------------|-----------|-----------------|---------------------------------|----------|
| Strain                            |           | Meninges                              | Cerebrum | Cerebellum | Hippo/thalamus | Granuloma | PMNs            | Macrophages<br>/Dendritic cells | Necrosis |
| <b>High<br/>virulence</b>         | SACI012-1 | -                                     | -        | -          | -              | -         | -               | -                               | -        |
|                                   | SACI012-4 | -                                     | -        | -          | -              | -         | -               | -                               | -        |
|                                   | SACI012-2 | +                                     | ++       | -          | -              | +         | ++              | -                               | ++       |
|                                   | SACI012-3 | -                                     | ++       | -          | ++             | -         | -               | -                               | ++       |
|                                   | UgCI302-1 | +                                     | -        | ++         | -              | -         | +               | +                               | -        |
|                                   | UgCI302-2 | -                                     | -        | -          | -              | -         | -               | -                               | -        |
|                                   | UgCI387-1 | -                                     | -        | -          | -              | -         | -               | -                               | -        |
|                                   | UgCI387-2 | -                                     | +        | -          | -              | -         | -               | -                               | -        |
|                                   | UgCI395-1 | -                                     | -        | -          | -              | -         | -               | -                               | -        |
| <b>Intermediate<br/>virulence</b> | UgCI538-2 | -                                     | -        | -          | -              | -         | +               | -                               | -        |
|                                   | UgCI538-1 | -                                     | -        | -          | -              | -         | -               | -                               | -        |
|                                   | MbCI006-1 | -                                     | -        | -          | -              | -         | -               | -                               | -        |
|                                   | MbCI006-2 | ++                                    | +++      | ++         | -              | -         | -               | -                               | ++       |
|                                   | SACI059-1 | +++                                   | +++      | +++        | +              | +++       | +               | -                               | +        |
|                                   | UgCI425-1 | +++                                   | ++       | +          | +              | -         | -               | -                               | -        |
|                                   | UgCI425-2 | +++                                   | +++      | ++         | +++            | +++       | -               | -                               | +++      |
| <b>Low<br/>virulence</b>          | UgCI223-1 | +++                                   | ++       | ++         | ++             | -         | -               | -                               | +++      |
|                                   | UgCI223-2 | -                                     | -        | -          | -              | -         | -               | -                               | -        |

Presence of *Cryptococcus*: - none, + scattered, ++ multifocal, +++ confluent ; PMN: polymorphonuclear cells
