# Supplementary material
Source: PubMed Central journal article supplement (PMC6479045)
Supplement: IAI.00046-19-s0007.pdf [file IAI.00046-19-s0007.pdf]

**Supplemental Table 3. Strain doubling time**

| Temperature | <i>High Virulence</i> |                             | <i>Intermediate Virulence</i> |                             | <i>Low Virulence</i> |                             |
|-------------|-----------------------|-----------------------------|-------------------------------|-----------------------------|----------------------|-----------------------------|
|             | Strain                | CFU Doubling Time (minutes) | Strain                        | CFU Doubling Time (minutes) | Strain               | CFU Doubling Time (minutes) |
| 30°C        | KN99 $\alpha$         | 135                         | UgCI538                       | 84                          | UgCI273              | 92                          |
|             | SACI012               | 133                         | SACI059                       | 130                         | UgCI552              | 96                          |
|             | UgCI395               | 96                          | MbCI006                       | 91                          | SACI010              | 109                         |
|             | UgCI302               | 174                         | UgCI425                       | 102                         |                      |                             |
|             | UgCI387               | 90                          |                               |                             |                      |                             |
|             | <b>Average</b>        | <b>126</b>                  |                               | <b>102</b>                  |                      | <b>99</b>                   |
|             | <b>St Dev</b>         | <b>31</b>                   |                               | <b>17</b>                   |                      | <b>7</b>                    |
| 37°C        | KN99 $\alpha$         | 146                         | UgCI538                       | 133                         | UgCI273              | 118                         |
|             | SACI012               | 139                         | SACI059                       | 126                         | UgCI552              | 111                         |
|             | UgCI395               | 76                          | MbCI006                       | 94                          | SACI010              | 381                         |
|             | UgCI302               | 83                          | UgCI425                       | 191                         |                      |                             |
|             | UgCI387               | 83                          |                               |                             |                      |                             |
|             | <b>Average</b>        | <b>105</b>                  |                               | <b>136</b>                  |                      | <b>203</b>                  |
|             | <b>St Dev</b>         | <b>30</b>                   |                               | <b>35</b>                   |                      | <b>126</b>                  |
