# Supplementary material
Source: PubMed Central journal article supplement (PMC6479045)
Supplement: IAI.00046-19-s0008.pdf [file IAI.00046-19-s0008.pdf]

**Supplemental Table 4. Titan cell formation**

|                        |               | <i>In vitro</i> |            | <i>In vivo</i> |
|------------------------|---------------|-----------------|------------|----------------|
|                        |               | Protocol-1      | Protocol-2 |                |
| High virulence         | KN99 $\alpha$ | +               | +          | +              |
|                        | UgCI302       | -               | -          | +              |
|                        | UgCI387       | -               | -          | +              |
|                        | UgCI395       | -               | -          | +              |
|                        | SACI012       | -               | -          | -              |
| Intermediate virulence | UgCI425       | -               | -          | +              |
|                        | UgCI538       | -               | -          | +              |
|                        | SACI059       | -               | -          | +              |
|                        | MbCI006       | -               | -          | +              |
| Low virulence          | UgCI223       | -               | -          | +              |
|                        | UgCI552       | +               | -          | +              |
|                        | SACI010       | +               | -          | +              |

+: presence of titan cells, -: no titan cell observed
