# Supplementary material
Source: PubMed Central journal article supplement (PMC6479045)
Supplement: IAI.00046-19-s0009.pdf [file IAI.00046-19-s0009.pdf]

**Supplemental Table 5. Minimum inhibitory concentration (MIC) for fluconazole and amphotericin B is not associated with strain virulence**

|                        | <b>Strain</b> | <b>Fluconazole MIC</b> | <b>Amphotericin B MIC</b> |
|------------------------|---------------|------------------------|---------------------------|
| High virulence         | KN99 $\alpha$ | 1                      | 0.5                       |
|                        | SACI012       | 1                      | 0.25                      |
|                        | UgCI302       | 1                      | 1                         |
|                        | UgCI395       | 2                      | 0.5                       |
|                        | UgCI387       | 0.5                    | 0.5                       |
| Intermediate virulence | UgCI425       | 2                      | 1                         |
|                        | UgCI538       | 2                      | 1                         |
|                        | SACI059       | 0.125                  | >8                        |
|                        | MbCI006       | 1                      | 1                         |
| Low virulence          | UgCI223       | 2                      | 1                         |
|                        | UgCI552       | 0.5                    | 0.5                       |
|                        | SACI010       | 2                      | ND                        |

ND: Not determined, isolate did not grow
